# Supplementary material
Source: publisher figshare collection journal article supplement (https://asha.figshare.com/ndownloader/files/9497197)
Supplement: Supplementary file 1 [file 9497197]

**Supplemental Material S1.** The interprofessional education session document outlining information regarding the case, time schedule, learning objectives, demonstration activities, and stimulus questions.

### **Audiology and Physician Assistant IPE Experience: Hearing Loss in the Older Adult**

#### **1:00–1:05pm Pre-Survey**

Students will meet on the 6<sup>th</sup> floor in 6B6

#### **1:05–1:15pm Introduction**

Interprofessional Education (IPE) occurs when students from two or more professions learn **about, from** and **with** each other to enable effective collaboration and improve health outcomes. Interprofessional education is a necessary step in preparing a "collaborative practice-ready" health workforce that is better prepared to respond to local health needs.

Student IPE Learning Expectations: After the laboratory-based IPE session, students should be able to

- describe how professionals in health and other fields can collaborate and integrate clinical care and public health interventions to optimize population health - Roles and Responsibilities (RR10).
- communicate information with another health team member in a form that is understandable, avoiding discipline-specific terminology when possible - Interprofessional Communication (CC2)

Healthy People 2020 is a national effort to build "A society in which all people live long, healthy lives." One of the topics within Healthy People 2020 is Hearing and Other Sensory or Communication Disorders. Healthy People 2020 works with other federal agencies, such as the CDC and HRSA to develop practice standards. You will probably "see" these standards in required components for documentation (as related to billing and reimbursement).

#### Hearing Objectives:

ENT-VSL-3 Increase the proportion of persons with hearing impairments who have ever used a hearing aid or assistive listening devices or who have cochlear implants

ENT-VSL-3.1 Increase the proportion of adults aged 20 to 69 years with hearing loss who have ever used a hearing aid

ENT-VSL-3.2 Increase the proportion of persons who are deaf or very hard of hearing and who have new cochlear implants

ENT-VSL-3.3 Increase the proportion of adults aged 70 years and older with hearing loss who have ever used a hearing aid

ENT-VSL-3.4 Increase the proportion of adults aged 70 years and older with hearing loss who use assistive listening devices

ENT-VSL-4 Increase the proportion of persons who have had a hearing examination on schedule

ENT-VSL-4.1 Increase the proportion of adults aged 20 to 69 years who have had a hearing examination in the past 5 years

ENT-VSL-4.2 Increase the proportion of adults aged 70 years and older who have had a hearing examination in the past 5 years

ENT-VSL-4.3 Increase the proportion of adolescents aged 12 to 19 years who have had a hearing examination in the past 5 years

ENT-VSL-5 Increase the number of persons who are referred by their primary care physician or other health care provider for hearing evaluation and treatment

**1:15–1:45pm and 1:45–2:25pm Student Group Laboratory Session**

The purpose of this session is for the both the audiology and PA student to demonstrate how a hearing test is conducted in his/her field.

**2:15–2:35pm Student IPE Session**

1. What have you learned about the way a hearing assessment is performed by the other discipline?

REVIEW THE CASE and answer the questions below - The son of a 75-year-old white man complains that his father is having trouble with speech discrimination and understanding what family members are saying during social events. The father has not seen a primary care provider in more than 2 years, denies any particular problems and lives alone. He takes an aspirin a day and hypertensive medication. The patient schedules an appointment to see a health care provider.

PA Examination reveals acuity decreased to whispered voice. TM with good cone of light. Weber midline. AC>BC. Examination of the ears showed no cerumen impaction and normal tympanic membranes.

2. In your opinion, what are the advantages of this patient seeing an audiologist first? a PA first?
3. If the PA assessed a patient and determined hearing loss, who could the PA make a referral to?
4. With a partner from another profession, discuss your findings of the patient's hearing loss (avoid using discipline specific language).
5. What other health care providers would you recommend to become a team member if the patient had
  - a. Balance issues
  - b. Tinnitus

- 
6. Provide the result of your partner's otoscopic exam (avoid using discipline specific language).
  7. With the Healthy People 2020 Hearing objectives ENT-VSL-4.2 and ENT-VSL-5 in mind, how will the collaboration between audiologists and PAs help to increase patients' hearing screenings?

**2:35–2:55pm Large Group Discussion/Group Report**

**2:55–3:00pm Post-Survey**
